# Supplementary material for: The Relationships between Prospection, Self-Efficacy, and Depression in College Students with Cross-Lagged Analysis
Source: MDPI journal article supplement (doi:10.3390/ijerph192214685), 2022-11-09
Supplement: s1 [file s1]

**Table S1.** *The SCEFT performance at T1 and T2 in valid participants (N = 276).*

|                      | <b>T1</b>        | <b>T2</b>        |
|----------------------|------------------|------------------|
|                      | <b>Mean (SD)</b> | <b>Mean (SD)</b> |
| <b>Specificity</b>   |                  |                  |
| Specific events      | 0.23(0.14)       | 0.23(0.15)       |
| Extended events      | 0.27(0.15)       | 0.27(0.16)       |
| Categoric events     | 0.22(0.15)       | 0.19(0.13)       |
| Sematic associations | 0.26(0.16)       | 0.28(0.17)       |
| Omissions            | 0.02(0.05)       | 0.03(0.06)       |
| <b>Emotion</b>       |                  |                  |
| Positive             | 0.51(0.21)       | 0.50(0.20)       |
| Neutral              | 0.44(0.19)       | 0.43(0.18)       |
| Negative             | 0.03(0.06)       | 0.04(0.07)       |

The SCEFT, the Sentence Completion for Events in the Future Test; T1, Time point 1; T2, time point 2
